# Supplementary material
Source: PubMed Central journal article supplement (PMC2572932)
Supplement: 0804766105_0804766105SI.pdf [file 0804766105_0804766105SI.pdf]

# Supporting Information

Kaiser *et al.* 10.1073/pnas.0804766105

Table S1. Detergents used for cell-free production of olfactory receptors

| Detergent                 | Charge  | CMC, % <sup>†</sup> | Concentration<br>(× CMC) <sup>‡</sup> |
|---------------------------|---------|---------------------|---------------------------------------|
| Anzergent 3-14            | zw      | 0.007               | 3                                     |
| Brij 58                   | ni      | 0.00045             | 3,300                                 |
| Cymal 5                   | ni      | 0.12                | 4                                     |
| Digitonin                 |         | 0.089               | 4                                     |
| DDM                       | ni      | 0.0087              | 11                                    |
| FC14                      | zw      | 0.0046              | 3                                     |
| Tri-mix (CHAPS, CHS, DDM) | zw a ni | 0.49 na 0.0087      | 2 na 115                              |

a, anionic; zw, zwitter ionic; ni, nonionic; na, not applicable.

<sup>†</sup>CMC in H<sub>2</sub>O from [www.anatrace.com](http://www.anatrace.com).

<sup>‡</sup>Concentration of detergent used during initial cell-free experiments.

**Table S2. Detergents used initially for cell-free production of olfactory receptors**

| Detergent                 | Charge  | CMC, % <sup>†</sup> | Concentration<br>(× CMC) <sup>‡</sup> |
|---------------------------|---------|---------------------|---------------------------------------|
| Anzergent 3-14            | zw      | 0.007               | 3                                     |
| Brij 58                   | ni      | 0.00045             | 22                                    |
| C8E4                      | ni      | 0.25                | 3                                     |
| Tri-mix (CHAPS, CHS, DDM) | zw a ni | 0.49 na 0.0087      | 2 na 115                              |
| Cyklophos 5               | zw      | 0.15                | 3                                     |
| Cymal 5                   | ni      | 0.12                | 3                                     |
| DDM                       | ni      | 0.0087              | 4.5                                   |
| DDOMG                     | zw      | 0.041               | 3                                     |
| FC14                      | zw      | 0.0046              | 10                                    |
| LDAO                      | zw      | 0.023               | 4                                     |

a , anionic; zw, zwitter ionic; ni, nonionic; na, not applicable.

<sup>†</sup>CMC measured in H<sub>2</sub>O from [www.anatrace.com](http://www.anatrace.com).

<sup>‡</sup>Concentration of detergent used during buffer screening.
